# Supplementary figures and images for: Social epidemiology of excess weight and central adiposity in older Indians: analysis of Study on global AGEing and adult health (SAGE)
Source: HighWire-hosted journal article supplement (doi:10.1136/bmjopen-2015-008608), 2015-11-01

Fig.S1. Causal diagram created using Bayesian Network Learning

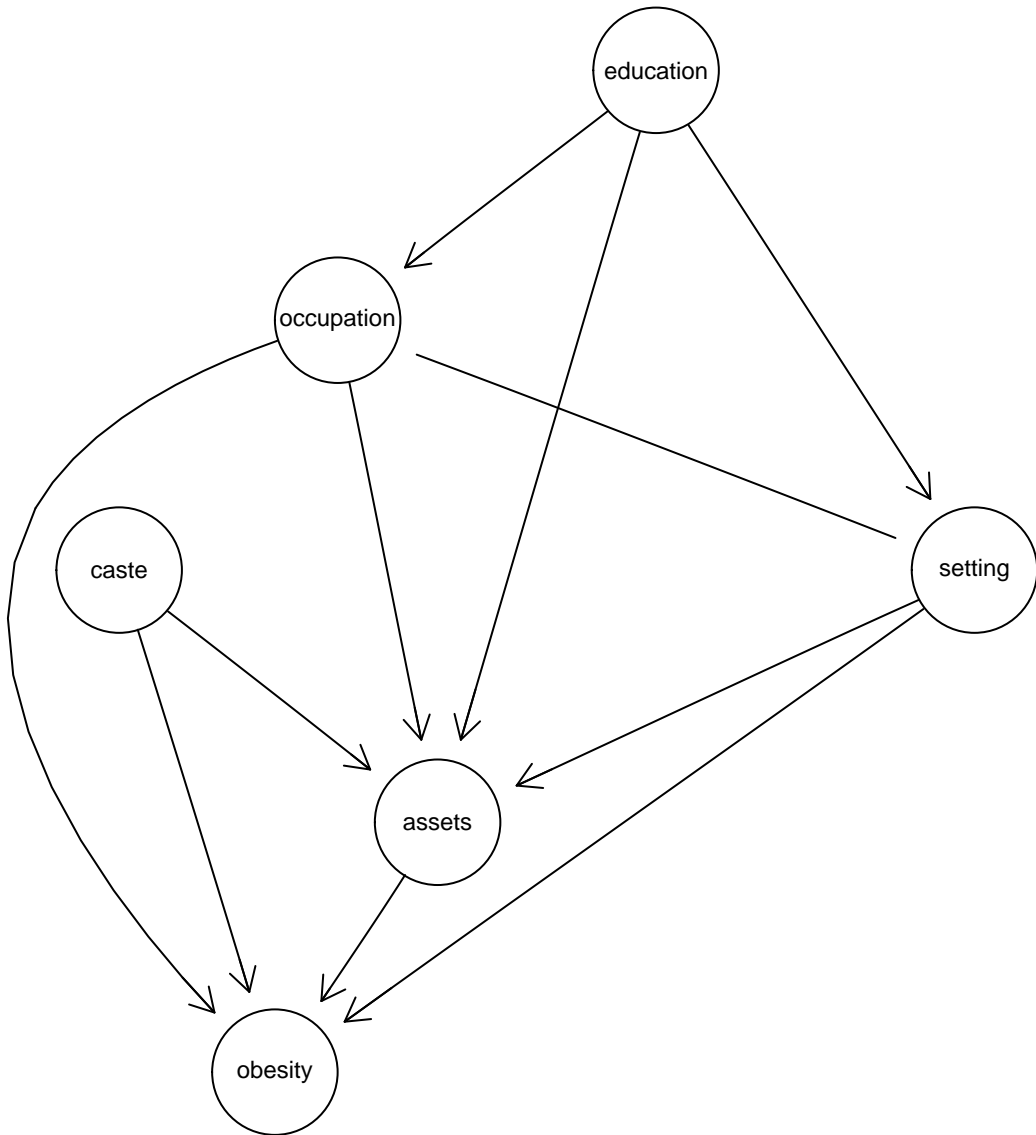

Supplement: bmjopen-2015-008608supp_figure1.pdf [file bmjopen-2015-008608supp_figure1.pdf]
